# Supplementary material for: FOXE1-Dependent Regulation of Macrophage Chemotaxis by Thyroid Cells In Vitro and In Vivo
Source: MDPI journal article supplement (doi:10.3390/ijms22147666), 2021-07-17
Supplement: s1 [file s1]

**A**

| Gene Symbol   | Fold change FC55 vs FRT | p-value   |
|---------------|-------------------------|-----------|
| <i>ABLIM3</i> | 3.68                    | 2.43e-03  |
| <i>IFI204</i> | 4.09                    | 3.72e-18  |
| <i>SOX6</i>   | 3.16                    | 9.72e-04  |
| <i>CELSR2</i> | 4.24                    | 4.10e-246 |
| <i>RHOQ</i>   | 3.04                    | 3.93e-103 |
| <i>CLSTN3</i> | 3.66                    | 8.10e-03  |
| <i>CFH</i>    | 1197.50                 | 8.53e-64  |
| <i>LCP1</i>   | 337.86                  | 0.00e+00  |
| <i>UNC13D</i> | -4.78                   | 1.26e-11  |
| <i>DPP4</i>   | -3.64                   | 7.08e-108 |
| <i>CAV1</i>   | 20.73                   | 1.19e-03  |
| <i>TAC4</i>   | -3.35                   | 4.73e-02  |
| <i>SLC1A2</i> | 14.36                   | 3.85e-21  |
| <i>HEPH</i>   | 1673.75                 | 1.44e-180 |
| <i>ADM</i>    | 5.61                    | 2.03e-06  |

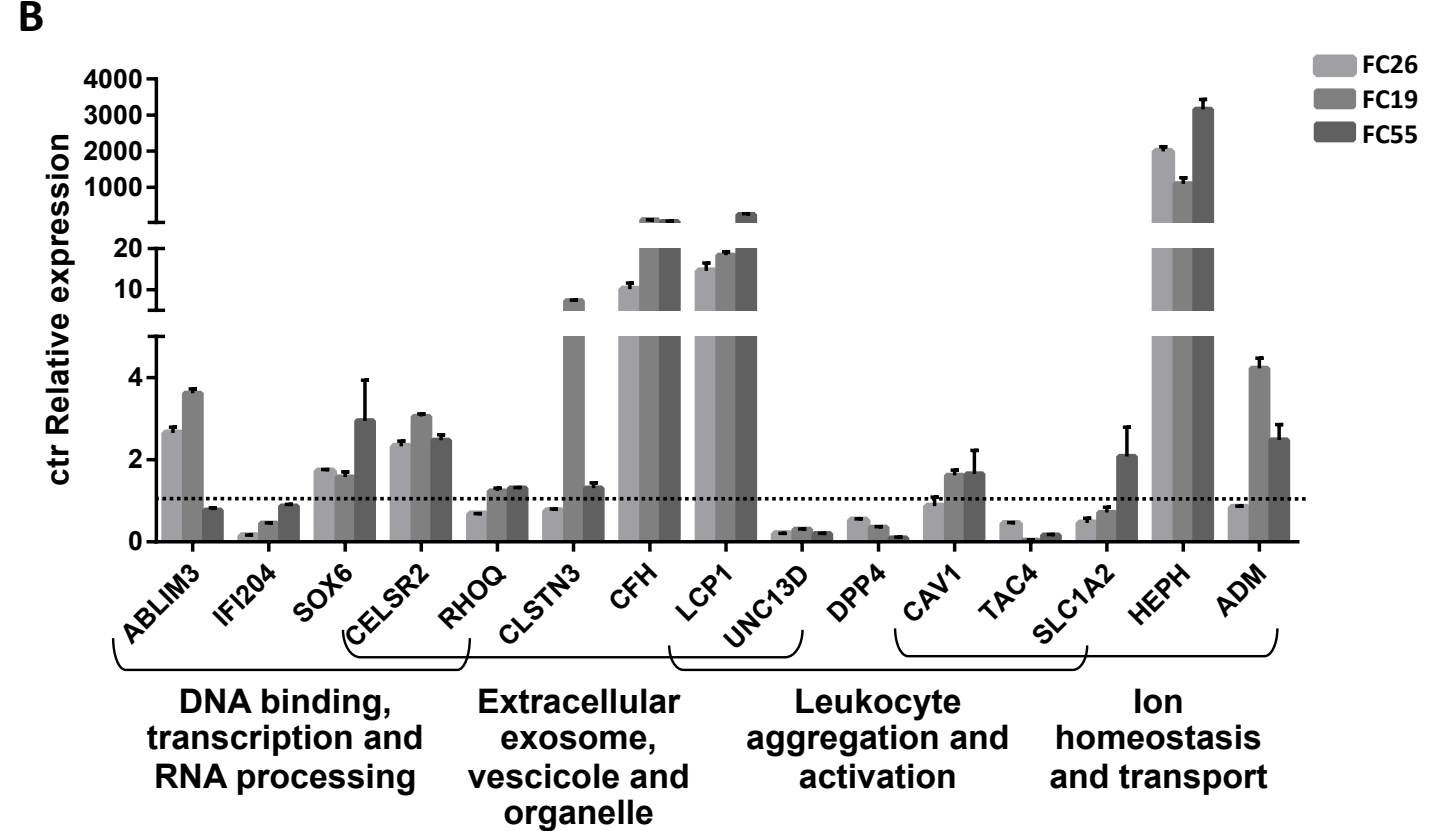

**Figure S1: Validation of DEG in FRT-overexpressing clones. A.** Selected genes from the results of RNA-seq performed on *FOXE1* overexpressing CF55. **B.** A qrt-PCR analysis, for the genes in A, was performed on *FOXE1*-clones compared to control FRT cells (ctr). The data are shown as ctr-relative expression ( $2^{-\Delta\Delta Ct}$ ) and reported referring to the functional category they belong to. The dotted line represents the ctr value set to 1. *TUBULIN* was used to normalize.

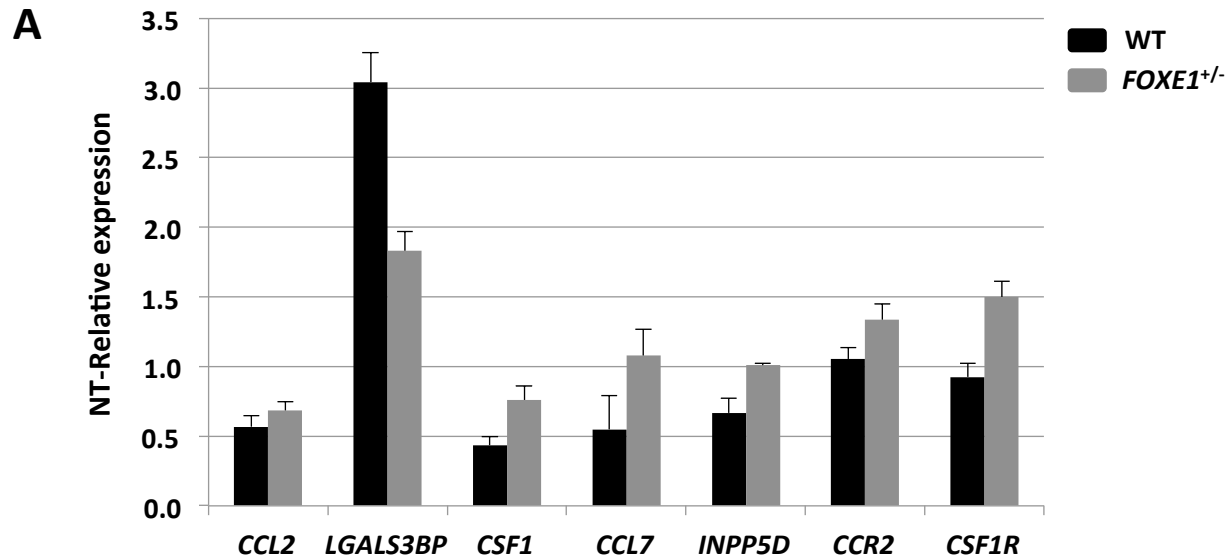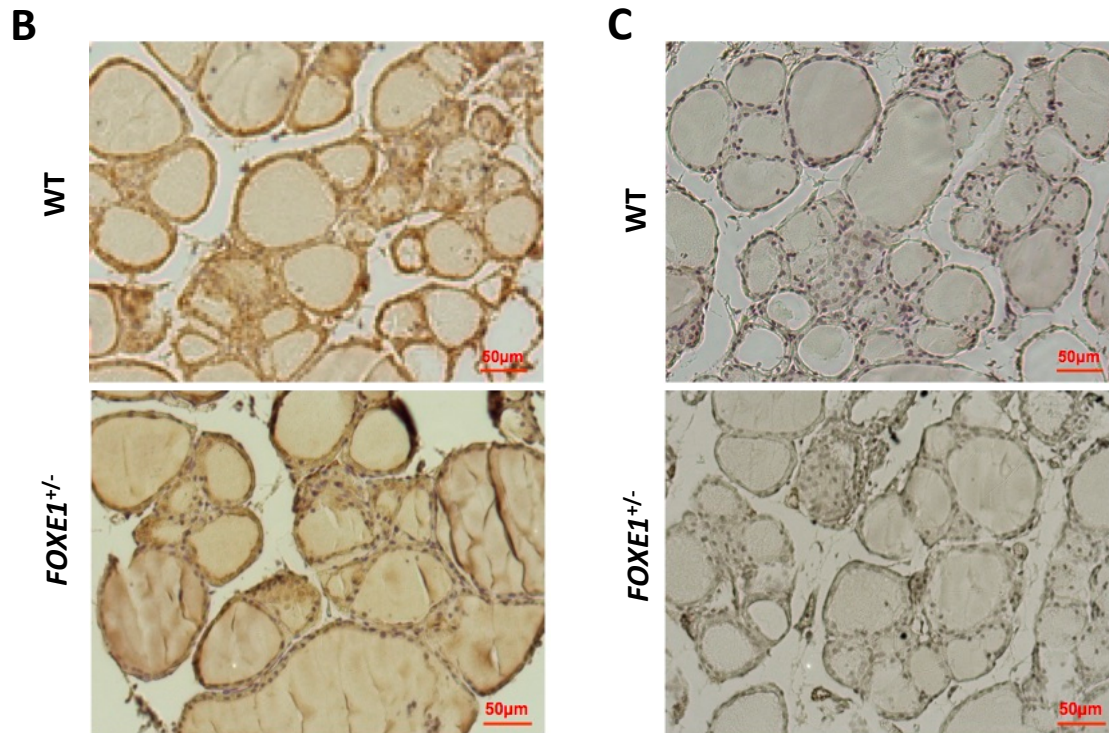

**Figure S2: A.** Total RNA was extracted from thyroids of doxycycline treated and untreated (NT) WT and *Foxe1*<sup>+/-</sup> mice and macrophages related markers were analyzed by quantitative RT-PCR. Results are reported as the fold change ( $2^{-\Delta\Delta C_t}$ ) of WT and *Foxe1*<sup>+/-</sup> treated mice respect to the corresponding untreated mice. Means  $\pm$  SD are shown. T-Test was performed on data founding no significance. **B, C.** IHC staining for IBA1 (B) and GALECTIN-3 (C) was performed on 7µm section of thyroids from WT and *Foxe1*<sup>+/-</sup> mice after doxycycline treatment. Hematoxylin was used to stain the nuclei. 20X magnifications are shown. Each image is representative of six different images.
